# Supplementary material for: Diastereoselective self-assembly of heterochiral Zn(ii) complexes of racemic Schiff bases in a chiral self-discriminating process: effect of non-covalent interactions on solid state structural self-assembly
Source: Royal Society of Chemistry journal article supplement (doi:10.1039/c3ra45082a), 2013-10-16
Supplement: c3ra45082a.pdf [file c3ra45082a.pdf]

*Supporting Information File*

**Diastereoselective self-assembly of heterochiral Zn(II) complexes of racemic Schiff bases in a chiral self-discriminating process: Effect of non-covalent interactions on solid state structural self-assembly**

**Himanshu Sekhar Jena†<sup>a\*</sup>**

*Department of Chemistry, Indian Institute of Technology Guwahati, Guwahati, Assam, India 781039. Email: hsjena@gmail.com, Tel.: +91 942 5807692, Fax: +91 755 4092392.*

**†Present Addresses**

*Post-Doctoral Fellow, Department of Chemistry, Indian Institute of Science Education and Research Bhopal, Madhya Pradesh, India 462023. Email: hsjena@iiserb.ac.in, Tel: +91 942 5807692, Fax: +91 755 4092392*

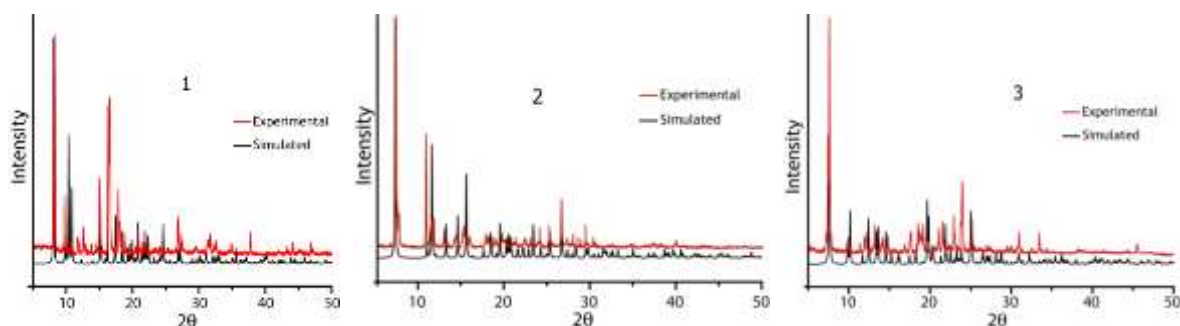

**Fig. S1** Powder X-ray diffraction patterns of compound 1-3.

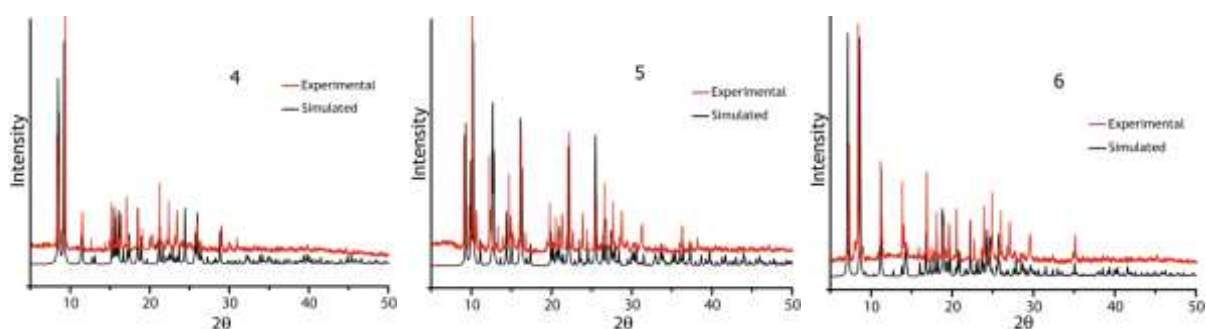

**Fig. S2** Powder X-ray diffraction patterns of compound 4-6.

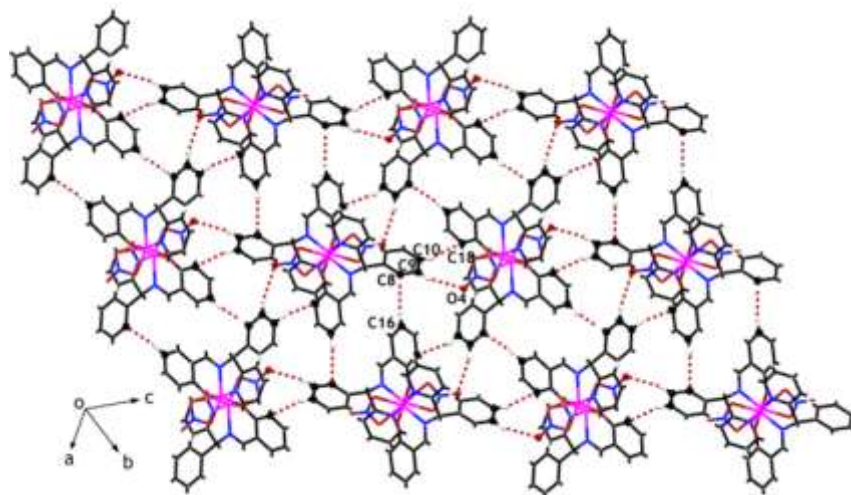

**Fig. S3** Packing diagram of **1** representing 2D flower structure originating from different C-H...O and localized C-H... $\pi$  interactions along *bc* plane.

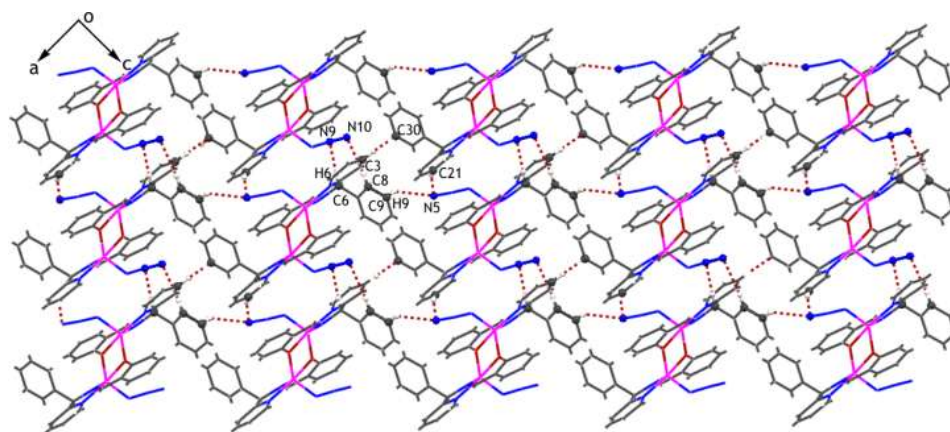

**Fig. S4** Packing diagram of **2** representing 2D layer structure originating from different C-H...N and localized C-H... $\pi$  interactions along *bc* plane.

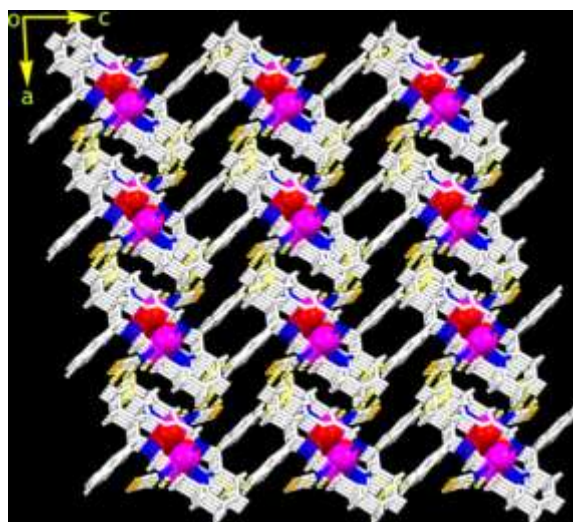

**Fig. S5** Packing diagram of **3** representing 3D porous structure along the *ac* plane originating from different non-covalent interactions.

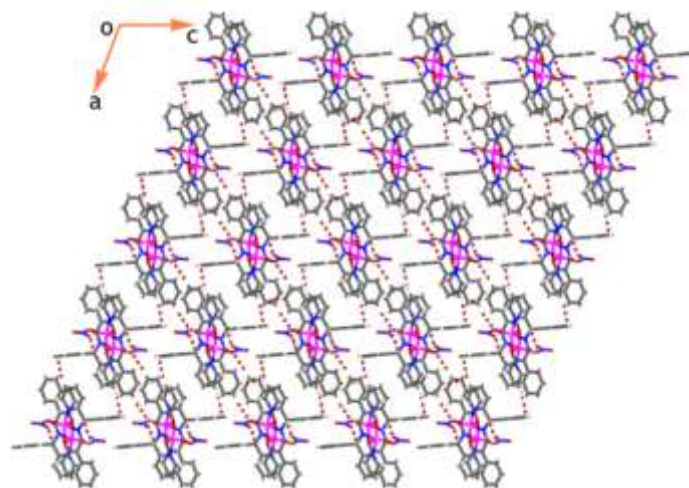

**Fig. S6** Packing diagram of Complex **4** representing a 3D staircase structure originating from different non-covalent interactions down the *b*-axis.

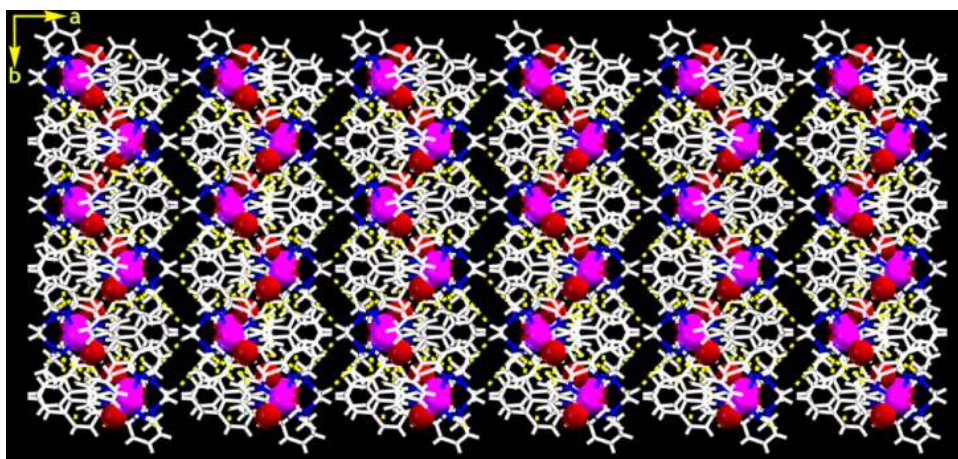

**Fig. S7** Packing diagram of **6** representing 3D zigzag structure down the *b*-axis thru different non-covalent interactions.
